# Supplementary material for: Undernutrition and its determinants among adolescent girls in low land area of Southern Ethiopia
Source: PubMed Central journal article supplement (PMC7802945; doi:10.1371/journal.pone.0240677), 2021-01-12

# PLOS ONE

## Under nutrition and its determinants among adolescent girls in low land area of southern Ethiopia --Manuscript Draft--

|                                                                                                                         |                                                                                                                                                                                                                                                                                                                                                                                                                                                                                                                                                                                                                                                                                                                                                                                                                                                                                                                                                                                                                                                                                                                                                                                                                                                                                                                                                                                                                                                                                                                                                                                                                                                                                                                                                                                                                                                                                                                                                                                                                                                                                                                                        |
|-------------------------------------------------------------------------------------------------------------------------|----------------------------------------------------------------------------------------------------------------------------------------------------------------------------------------------------------------------------------------------------------------------------------------------------------------------------------------------------------------------------------------------------------------------------------------------------------------------------------------------------------------------------------------------------------------------------------------------------------------------------------------------------------------------------------------------------------------------------------------------------------------------------------------------------------------------------------------------------------------------------------------------------------------------------------------------------------------------------------------------------------------------------------------------------------------------------------------------------------------------------------------------------------------------------------------------------------------------------------------------------------------------------------------------------------------------------------------------------------------------------------------------------------------------------------------------------------------------------------------------------------------------------------------------------------------------------------------------------------------------------------------------------------------------------------------------------------------------------------------------------------------------------------------------------------------------------------------------------------------------------------------------------------------------------------------------------------------------------------------------------------------------------------------------------------------------------------------------------------------------------------------|
| <b>Manuscript Number:</b>                                                                                               | PONE-D-19-32334                                                                                                                                                                                                                                                                                                                                                                                                                                                                                                                                                                                                                                                                                                                                                                                                                                                                                                                                                                                                                                                                                                                                                                                                                                                                                                                                                                                                                                                                                                                                                                                                                                                                                                                                                                                                                                                                                                                                                                                                                                                                                                                        |
| <b>Article Type:</b>                                                                                                    | Research Article                                                                                                                                                                                                                                                                                                                                                                                                                                                                                                                                                                                                                                                                                                                                                                                                                                                                                                                                                                                                                                                                                                                                                                                                                                                                                                                                                                                                                                                                                                                                                                                                                                                                                                                                                                                                                                                                                                                                                                                                                                                                                                                       |
| <b>Full Title:</b>                                                                                                      | Under nutrition and its determinants among adolescent girls in low land area of southern Ethiopia                                                                                                                                                                                                                                                                                                                                                                                                                                                                                                                                                                                                                                                                                                                                                                                                                                                                                                                                                                                                                                                                                                                                                                                                                                                                                                                                                                                                                                                                                                                                                                                                                                                                                                                                                                                                                                                                                                                                                                                                                                      |
| <b>Short Title:</b>                                                                                                     | Under nutrition and its determinants among adolescent girls in low land area of southern Ethiopia                                                                                                                                                                                                                                                                                                                                                                                                                                                                                                                                                                                                                                                                                                                                                                                                                                                                                                                                                                                                                                                                                                                                                                                                                                                                                                                                                                                                                                                                                                                                                                                                                                                                                                                                                                                                                                                                                                                                                                                                                                      |
| <b>Corresponding Author:</b>                                                                                            | Yoseph Halala Handiso, Msc<br>Wolaita Sodo University<br>Sodo, ETHIOPIA                                                                                                                                                                                                                                                                                                                                                                                                                                                                                                                                                                                                                                                                                                                                                                                                                                                                                                                                                                                                                                                                                                                                                                                                                                                                                                                                                                                                                                                                                                                                                                                                                                                                                                                                                                                                                                                                                                                                                                                                                                                                |
| <b>Keywords:</b>                                                                                                        | Adolescent girls, Under-nutrition, determinants, southern Ethiopia                                                                                                                                                                                                                                                                                                                                                                                                                                                                                                                                                                                                                                                                                                                                                                                                                                                                                                                                                                                                                                                                                                                                                                                                                                                                                                                                                                                                                                                                                                                                                                                                                                                                                                                                                                                                                                                                                                                                                                                                                                                                     |
| <b>Abstract:</b>                                                                                                        | <p><b>Abstract</b></p> <p><b>Background</b> : Undernutrition is one of the most common causes of morbidity and mortality among adolescent girls worldwide, especially in South-East Asia and Africa. Even though adolescence is a window of opportunity to break the intergenerational cycle of undernutrition, adolescent girls are a neglected group. The objective of this study was to assess the nutritional status and associated factors among adolescent girls in the Wolaita and Hadiya zones of Southern Ethiopia.</p> <p><b>Methods</b> : A community-based cross-sectional study was conducted, and a multistage sampling method was used to select a sample of 843 adolescent girls. Anthropometric measurements were collected from all participants and entered in the WHO Anthro plus software for Z-score analysis. The data was analyzed using EPI-data 4.4.2 and SPSS version 21.0. The odds ratios for logistic regression along with a 95% confidence interval (CI) were estimated. A P- value &lt; 0.05 was declared as the level of statistical significance.</p> <p><b>Result</b> : Thinness and stunting are found to be public health problems in the study area. Age [AOR(adjusted odds ratio) (95% CI) = 2.91 (2.03-4.173)], family size [AOR (95% CI) = 1.63(1.105-2.396)], monthly income [AOR (95% CI) = 2.54(1.66-3.87)], taking deworming tablets [AOR (95% CI) = 1.56(1.11--21)], the father's educational status [AOR (95% CI) = 2.45(1.02-5.86)], skipping regular meals [AOR (95% CI) = 2.83(1.92-4.17)], the source of food for the family [AOR (95% CI) = 5.14(2.1--12.8)], visits from health extension workers [AOR (95% CI) = 1.72(1.7-2.4)], and hand washing before eating and after using the toilet [AOR (95% CI) = 2.25(1.079-4.675)] were associated with nutritional status in the Wolaita and Hadiya zones, Southern Ethiopia. An inter-sectorial collaboration should be used to implement community based health and nutrition programs, i.e. schools and agricultural experts should work together with health experts to improve the nutritional status of adolescent girls.</p> |
| <b>Order of Authors:</b>                                                                                                | Yoseph Halala Handiso, Msc<br>Tefera Belachew<br>Cherinet Abuye<br>Abdulhalik Workicho<br>Kaleab Baye                                                                                                                                                                                                                                                                                                                                                                                                                                                                                                                                                                                                                                                                                                                                                                                                                                                                                                                                                                                                                                                                                                                                                                                                                                                                                                                                                                                                                                                                                                                                                                                                                                                                                                                                                                                                                                                                                                                                                                                                                                  |
| <b>Additional Information:</b>                                                                                          |                                                                                                                                                                                                                                                                                                                                                                                                                                                                                                                                                                                                                                                                                                                                                                                                                                                                                                                                                                                                                                                                                                                                                                                                                                                                                                                                                                                                                                                                                                                                                                                                                                                                                                                                                                                                                                                                                                                                                                                                                                                                                                                                        |
| <b>Question</b>                                                                                                         | <b>Response</b>                                                                                                                                                                                                                                                                                                                                                                                                                                                                                                                                                                                                                                                                                                                                                                                                                                                                                                                                                                                                                                                                                                                                                                                                                                                                                                                                                                                                                                                                                                                                                                                                                                                                                                                                                                                                                                                                                                                                                                                                                                                                                                                        |
| <b>Financial Disclosure</b><br><br>Enter a financial disclosure statement that describes the sources of funding for the | Addis Ababa center of Food Science and Nutrition, Wolaita Sodo university and Tufts University Ethiopia, for their small research grant                                                                                                                                                                                                                                                                                                                                                                                                                                                                                                                                                                                                                                                                                                                                                                                                                                                                                                                                                                                                                                                                                                                                                                                                                                                                                                                                                                                                                                                                                                                                                                                                                                                                                                                                                                                                                                                                                                                                                                                                |

work included in this submission. Review the [submission guidelines](#) for detailed requirements. View published research articles from [PLOS ONE](#) for specific examples.

This statement is required for submission and **will appear in the published article** if the submission is accepted. Please make sure it is accurate.

#### Unfunded studies

Enter: *The author(s) received no specific funding for this work.*

#### Funded studies

Enter a statement with the following details:

- Initials of the authors who received each award
- Grant numbers awarded to each author
- The full name of each funder
- URL of each funder website
- Did the sponsors or funders play any role in the study design, data collection and analysis, decision to publish, or preparation of the manuscript?
- **NO** - Include this sentence at the end of your statement: *The funders had no role in study design, data collection and analysis, decision to publish, or preparation of the manuscript.*
- **YES** - Specify the role(s) played.

\* typeset

#### Competing Interests

Use the instructions below to enter a competing interest statement for this submission. On behalf of all authors, disclose any [competing interests](#) that could be perceived to bias this work—acknowledging all financial support and any other relevant financial or non-financial competing interests.

This statement **will appear in the published article** if the submission is accepted. Please make sure it is accurate. View published research articles from [PLOS ONE](#) for specific examples.

All authors have declared that no competing interests exist

**NO authors have competing interests**

Enter: *The authors have declared that no competing interests exist.*

**Authors with competing interests**

Enter competing interest details beginning with this statement:

*I have read the journal's policy and the authors of this manuscript have the following competing interests: [insert competing interests here]*

\* typeset

**Ethics Statement**

N/A

Enter an ethics statement for this submission. This statement is required if the study involved:

- Human participants
- Human specimens or tissue
- Vertebrate animals or cephalopods
- Vertebrate embryos or tissues
- Field research

Write "N/A" if the submission does not require an ethics statement.

General guidance is provided below. Consult the [submission guidelines](#) for detailed instructions. **Make sure that all information entered here is included in the Methods section of the manuscript.**

**Format for specific study types**

**Human Subject Research (involving human participants and/or tissue)**

- Give the name of the institutional review board or ethics committee that approved the study
- Include the approval number and/or a statement indicating approval of this research
- Indicate the form of consent obtained (written/oral) or the reason that consent was not obtained (e.g. the data were analyzed anonymously)

**Animal Research (involving vertebrate animals, embryos or tissues)**

- Provide the name of the Institutional Animal Care and Use Committee (IACUC) or other relevant ethics board that reviewed the study protocol, and indicate whether they approved this research or granted a formal waiver of ethical approval
- Include an approval number if one was obtained
- If the study involved *non-human primates*, add *additional details* about animal welfare and steps taken to ameliorate suffering
- If anesthesia, euthanasia, or any kind of animal sacrifice is part of the study, include briefly which substances and/or methods were applied

**Field Research**

Include the following details if this study involves the collection of plant, animal, or other materials from a natural setting:

- Field permit number
- Name of the institution or relevant body that granted permission

**Data Availability**

Authors are required to make all data underlying the findings described fully available, without restriction, and from the time of publication. PLOS allows rare exceptions to address legal and ethical concerns. See the [PLOS Data Policy](#) and [FAQ](#) for detailed information.

Yes - all data are fully available without restriction

A Data Availability Statement describing where the data can be found is required at submission. Your answers to this question constitute the Data Availability Statement and **will be published in the article**, if accepted.

**Important:** Stating 'data available on request from the author' is not sufficient. If your data are only available upon request, select 'No' for the first question and explain your exceptional situation in the text box.

Do the authors confirm that all data underlying the findings described in their manuscript are fully available without restriction?

**Describe where the data may be found in full sentences. If you are copying our sample text, replace any instances of XXX with the appropriate details.**

- If the data are **held or will be held in a public repository**, include URLs, accession numbers or DOIs. If this information will only be available after acceptance, indicate this by ticking the box below. For example: *All XXX files are available from the XXX database (accession number(s) XXX, XXX).*
- If the data are all contained **within the manuscript and/or Supporting Information files**, enter the following:  
*All relevant data are within the manuscript and its Supporting Information files.*
- If neither of these applies but you are able to provide **details of access elsewhere**, with or without limitations, please do so. For example:

*Data cannot be shared publicly because of [XXX]. Data are available from the XXX Institutional Data Access / Ethics Committee (contact via XXX) for researchers who meet the criteria for access to confidential data.*

*The data underlying the results presented in the study are available from (include the name of the third party*

All relevant data are within the manuscript and its supporting information files

*and contact information or URL).*

- This text is appropriate if the data are owned by a third party and authors do not have permission to share the data.

\* typeset

Additional data availability information:

# 1 **Undernutrition and Its Determinants among Adolescent** 2 **Girls in Low Land Areas of Southern Ethiopia**

3  
4 Yoseph Halala<sup>1</sup>, Tefera Belachew<sup>3</sup>, Cherinet Abuye<sup>4</sup>, Abdulhalik Workicho<sup>3</sup>, Kaleab Baye<sup>2</sup>

5  
6 1. School of Public Health, College of Health Sciences and Medicine, Wolaita Sodo University, Ethiopia  
7 [yosefhalala@gmail.com](mailto:yosefhalala@gmail.com)

8 2. Center for Food Science and Nutrition, College of Natural and Computational Sciences Addis Ababa  
9 University, Honorary Research Fellow, Bioversity International and Deputy Regional Secretary for  
10 Africa, World Public Health Nutrition Association (WPHNA), [kaleabbaye@gmail.com](mailto:kaleabbaye@gmail.com)

11 3. Human nutrition unit, College of public health & Medical Science, Jimma University, Ethiopia,  
12 [teferabelachew@gmail.com](mailto:teferabelachew@gmail.com)

13 4. ENGINE/Save the Children, Addis Ababa, Ethiopia, [cherinet.abuye@savethechildren.org](mailto:cherinet.abuye@savethechildren.org).

14  
15  
16  
17 Corresponding Author: Yoseph Halala

18 Email: [yosefhalala@gmail.com](mailto:yosefhalala@gmail.com)

19 All authors have contributed to this work.

20

21

22

23

24

25

26

# 1 **Abstract**

2 **Background:** *Undernutrition is one of the most common causes of morbidity and mortality among adolescent girls*  
3 *worldwide, especially in South-East Asia and Africa. Even though adolescence is a window of opportunity to break*  
4 *the intergenerational cycle of undernutrition, adolescent girls are a neglected group. The objective of this study*  
5 *was to assess the nutritional status and associated factors among adolescent girls in the Wolaita and Hadiya zones*  
6 *of Southern Ethiopia.*

7 **Methods:** *A community-based cross-sectional study was conducted, and a multistage sampling method was used to*  
8 *select a sample of 843 adolescent girls. Anthropometric measurements were collected from all participants and*  
9 *entered in the WHO Anthro plus software for Z-score analysis. The data was analyzed using EPI-data 4.4.2 and*  
10 *SPSS version 21.0. The odds ratios for logistic regression along with a 95% confidence interval (CI) were*  
11 *estimated. A P-value < 0.05 was declared as the level of statistical significance.*

12 **Result:** *Thinness and stunting are found to be public health problems in the study area. Age [AOR(adjusted odds*  
13 *ratio) (95% CI) = 2.91 (2.03-4.173)], family size [AOR (95% CI) = 1.63(1.105-2.396)], monthly income [AOR*  
14 *(95% CI) = 2.54(1.66-3.87)], taking deworming tablets [AOR (95% CI) = 1.56(1.11--21)], the father's*  
15 *educational status [AOR (95% CI) = 2.45(1.02-5.86)], skipping regular meals [AOR (95% CI) = 2.83(1.92-4.17)],*  
16 *the source of food for the family [AOR (95% CI) = 5.14(2.1--12.8)], visits from health extension workers [AOR*  
17 *(95% CI) = 1.72(1.7-2.4)], and hand washing before eating and after using the toilet [AOR (95% CI) =*  
18 *2.25(1.079-4.675)] were associated with nutritional status in the Wolaita and Hadiya zones, Southern Ethiopia. An*  
19 *inter-sectorial collaboration should be used to implement community based health and nutrition programs, i.e.*  
20 *schools and agricultural experts should work together with health experts to improve the nutritional status of*  
21 *adolescent girls.*

22



## 23 **Introduction**

24 Adolescence is defined as the age range from 10–19 years, and it is a period of transition from childhood  
25 to adulthood. The adolescent age group comprises 20% of the global population [1]. Malnutrition,  
26 particularly undernutrition, is highly prevalent among adolescents in developing countries [2, 3]. A  
27 study from northern Ethiopia reported high levels of stunting (26.5%) and thinness (58.3%) among  
28 adolescents [4]. Nutrition status among adolescents is an important determinant of health outcomes;  
29 undernutrition affects the health status of adolescent girls. In addition to causing significant mortality, it  
30 creates long lasting effects on the growth, development, and physical fitness of survivors [5]. This, in  
31 turn, affects their ability to learn and work at maximal productivity [6]. Undernutrition is an indicator of  
32 poor nutrition and has major consequences on human health as well as the social and economic  
33 development of the population [7]. Physical growth and development during puberty increase  
34 requirements for energy, protein, and many vitamins and minerals, and deficiencies can lead to  
35 physiological, anatomical, and functional disturbances [8]

36 The nutritional status of adolescent girls can have intergenerational effects because adolescent girls with  
37 poor nutritional status are more likely to give birth to low birth weight infants [8, 9]. Focus on  
38 adolescent girls is important because their health and nutritional status before as well as during  
39 pregnancy influences fetal growth and newborn health. Adolescent girls' health and undernutrition is an  
40 important determinant of adverse fetal outcomes, including low birth weight, preterm births, stillbirths,  
41 and an increased risk of neonatal mortality [10]. Therefore, adequate nutrition is key; it is associated  
42 with a better quality of life and has many intergeneration benefits[11].

43 Most causes of malnutrition are related to poor care, poor economic status, and food insecurity;  
44 however, malnutrition can sometimes be inherited genetically [12]. Family size, presence of malaria

45 infections, cigarette smoking, alcohol and drug use, environmental pollution, and domestic violence are  
46 predictors of undernutrition [13].

47 In regions of South-East Asia and Africa, a large number of adolescent girls suffer from  
48 chronic undernutrition, which adversely impacts their own health and development, as well as that of  
49 their offspring, contributing to an intergenerational cycle of malnutrition [14].

50 Even though the sustainable development goals (SDGs) include an adolescent nutrition service which is  
51 addressing adolescent malnutrition, the nutritional status of adolescent girls is not improving [15]. The  
52 government of Ethiopia officially launched the National Nutrition Program (NNP) in 2009, which aimed  
53 to reduce malnutrition in Ethiopia by integrating adolescents' nutrition into community-based health and  
54 development programs but faced many challenges. The Ethiopian NNP II (2016-2020) incorporated  
55 initiatives to improve the nutritional status of adolescent girls, but which interventions under which  
56 circumstances are effective remains unknown [16, 17]. However, most of these studies have included  
57 only adolescents attending school, and thus, the results of these studies cannot be generalized to the  
58 whole adolescent community. In addition to this, there are no community based studies conducted in  
59 Southern Ethiopia among adolescent girls. Therefore, understanding nutritional status and its associated  
60 factors are critical to timely address malnutrition in this age group.

## 61 **Methods and Materials**

62 The study was conducted in the Wolaita and Hadiya zones of Southern Ethiopia. These zones are  
63 predominantly dependent on agriculture, practicing mixed crop-livestock production and living in  
64 permanent settlements. Within their landholdings, community members cultivate fruits, vegetables,  
65 roots, and tuber crops.

66 Fig 1 Map of the study sites (Wolaita and Hadiya zones) in southern nation nationality and peoples  
67 region (SNNPR)2019

68 A community-based cross-sectional study was conducted at two zones in Southern Ethiopia from April  
69 30, 2019 to May 30, 2019. The inclusion criteria were adolescent girls (both attending and not attending  
70 school) between the ages of 10-19 years in two Southern Ethiopian zones. Participants who met the  
71 inclusion criteria were randomly selected to be the study population. Body mass index for age z-score  
72 and height for age z-score were the dependent variables. Age, educational status of the participant,  
73 family size, maternal and paternal educational, access to nutritional counseling services in health  
74 facilities, deworming tablets, iron-folic acid supplementation, household monthly income, source of  
75 food, and number of meals per day were the independent variables for our study.

#### 76 **Sample size determination**

77 A single population proportion formula,  $[n = \frac{z^2 P (1-P)}{d^2}]$  was used to estimate the sample size. From  
78 the literature review, the prevalence of thinness (24.4%) and stunting (29.4%) were used for sample  
79 size calculations. For this study, stunting (29.4%) was used to estimate the sample size as it gives a  
80 larger sample; considering a 95% confidence interval (CI) and  $d=0.05\%$ , the initial sample size was  
81 383. By adding 10% for non-response and a design effect of 2.4, the final sample size was **843**.  
82  $n = \frac{(Z_{\alpha/2})^2 * p (1-p) DE}{d^2}$ . Where: Z = Standard normal distribution value at 95% CI =  $(1.96)^2$ , DE =  
83 design effect, and  $d = 0.05$  (5% margin of error)

#### 84 **Sampling procedures**

85 This study used multistage sampling techniques and was conducted in the Wolaita and Hadiya zones.  
86 From these two selected zones, two districts were selected based on a simple random sampling  
87 procedure, the Humbo district from Wolaita zone and the Misrak Badawacho district from the Hadiya  
88 zone. Three kebeles were selected from each district using a simple random method. A census of

89 adolescent girls was conducted at these selected kebeles. This census was developed with the help of  
90 both the local government administration, woreda in particular, and health extension workers. During  
91 the development of the census, if there was more than one adolescent girl in a household, one  
92 adolescent girl was randomly selected. From the selected six kebeles, 843 participants were chosen  
93 depending on the number of adolescent girls in each kebele. Participants were drawn from each kebele  
94 based on probability proportional to size (PPS) sampling. The sampling techniques depended on the  
95 number of adolescent girls in each kebele. Adolescent girls who were not eligible for the study were  
96 excluded.

### 97 **Anthropometric measurements**

98 Anthropometrics (i.e., height and weight) were measured on all sampled adolescent girls. Weight was  
99 measured to the nearest 100 g using a standard SECA digital scale while the participants wore light  
100 clothing and no shoes. The scale was calibrated after weighing each participant. Height was measured in  
101 a standing position to the nearest 0.1 cm using a vertical stadiometer with a detachable sliding headpiece.  
102 Body mass index for age z-scores and height for age z-scores were calculated using the height, weight,  
103 and age of the participants.

### 104 **Data collection**

105 A structured interviewer-administered questionnaire was used to collect data. The questionnaire was  
106 developed based on a thorough review of the current literature. A total of eight nurses with BSc  
107 degrees; previous experience collecting data; and knowledge of the culture, language, and norms of the  
108 community were employed to collect data using a pretested structured questionnaire. In addition to  
109 this, two supervisors with MSc in public health were employed to supervise the data collection  
110 process. Data was collected on weekends for adolescent girls who attended school during the  
111 weekdays. The principal investigator controlled the daily overall study activities.

## 112 **Statistical analysis**

113 First, the data were checked for completeness and consistency for data entry and cleaning. Then, data  
114 were entered into the computer using EPI-data version 4.4.2 and exported to SPSS version 21.0 for  
115 further analysis. Descriptive statistics such as frequencies, proportions, and cross-tabulation were used  
116 to present the data. In addition, bivariate logistic regression analysis was performed to assess the  
117 association between independent and dependent variables. Variables that showed an association (p-value  
118  $\leq 0.25$ ) in the bivariate analysis were included in the final multivariate logistic regression model. Odds  
119 ratios for logistic regression along with a 95% CI were estimated. A p-value less than 0.05 was declared  
120 statistically significant.

## 121 **Data quality assurance**

122 The questionnaire was prepared in English, translated to Amharic, and rendered back to English to  
123 maintain consistency of the questions. Data collectors and supervisors were trained for 4 days to  
124 properly fill out the questionnaire and measure anthropometry. Data collectors were selected from each  
125 zone so they could communicate fluently in the local language and understand the socio-cultural  
126 practices of the community. The questionnaire was pre-tested on 5% adolescent girls in a similar area to  
127 the study sites to ensure reliability. Feedbacks from the pre-test were incorporated into the final  
128 questionnaire design. Principal investigators and supervisors performed checks on the spot and reviewed  
129 all the completed questionnaires to ensure completeness and consistency of the information collected.  
130 Standardization of anthropometric measurements was conducted. To standardize anthropometric  
131 measurements, during training an expert took two heights and weight measurements for ten adolescent  
132 girls and then let each data collector take the measurements for all ten girls twice. Then, the averages of  
133 the two measurements for each adolescent girl taken by the data collector were compared with the  
134 average of the expert's measurements. The technical error of measurement and coefficient of variance

135 (CV) were computed for all data collectors using ETL for SMART software. Data collators with  
136 unacceptable TEM and CV could repeat the steps again.

### 137 **Ethical considerations**

138 The study was approved by Addis Ababa University (AAU), College of Natural Sciences Research  
139 Ethics Review Committee. The official letter of cooperation was written to the Wolaita and Hadiya  
140 zones, and the district of health offices. The nature of the study was fully explained to the study  
141 participants and parents/guardians. Informed verbal and written consents were obtained from the  
142 parents/guardians for adolescent girls aged < 18 years old and assent was obtained from the participant  
143 before the interview. Participants  $\geq$  18 years were asked to provide verbal and written consent. The  
144 collected data were kept confidential. Each participant was given a code number, and the data were  
145 stored in a secure and password-protected database.

## 146 **Results**

### 147 **Socio-demographic characteristics of adolescent girls in Southern Ethiopia**

148 Eight hundred and twenty adolescent girls participated with a response rate of 97.3%.

149 As shown in Table 1, the average age of the study participants was 14.6 ( $\pm$ 1.9) years, the average  
150 family size was 6.5 ( $\pm$ 1.83) persons, while 69.3% of the households had 3 family members and  
151 30.7% had 4 family members. About three fourths (70%) of the study participants were in grades  
152 8, 23.3% were in grades 1-4, and only 0.5% had no formal education. Most of the study participants  
153 were Protestant (77%), but 17% were Orthodox Christian, and only 0.7% were Muslims. About  
154 33.4% of the study participants were from households that have < 1000 ETB per monthly income and  
155 30.3% are from households that have > 2000 ETB per monthly income.

156 **Table 1** Socio-demographic characteristics of adolescent girls in Southern Ethiopia, 2019

| Variable                 | Level                  | Frequency(n) | Percent (%) |
|--------------------------|------------------------|--------------|-------------|
| Age                      | 10–13                  | 393          | 47.9        |
|                          | 14–16                  | 373          | 45.5        |
|                          | 17–19                  | 54           | 6.6         |
| Educational status       | No formal education    | 4            | 0.5         |
|                          | 1–8 grade              | 765          | 93.3        |
|                          | 9–12 grade             | 49           | 6.0         |
|                          | College and University | 2            | 0.2         |
| Religion                 | Orthodox               | 281          | 34.3        |
|                          | Protestant             | 533          | 65.0        |
|                          | Muslim                 | 6            | 0.7         |
| Family size              | ≤5 family members      | 252          | 30.7        |
|                          | >5 family members      | 568          | 69.3        |
| Monthly household income | <1000 ETBirr           | 274          | 33.4        |
|                          | 1001–2000 ETBirr       | 298          | 36.3        |
|                          | >2000 ETBirr           | 248          | 30.3        |

172 Source: f survey, 2019

173 **Nutrition service and health-related factors of adolescent girls in Southern Ethiopia**

174 As indicated in Table 2, approximately 70.4 % of the study participants did not receive nutrition  
 175 education. Only 29.6 % of the study participants had nutrition education. Similarly, 54.9% of the study

176 participants never received deworming tablets and only 45.1% have received a deworming tablet. Out of  
 177 the participants who have taken deworming tablets, 65.6% have taken two tablets and 34.4% have taken  
 178 one tablet every six months. When considering iron and folate supplementation, only 0.4% of the study  
 179 participants have supplements. Of the total study participants with access to nutrition services, only  
 180 60.4% received friendly nutrition service, but 39.5% of the study participants did not receive friendly  
 181 nutrition service and they were not satisfied by the services that were provided by health experts. In  
 182 66.1% of the households, the fathers were the primary decision-makers regarding nutrition service.  
 183 About 27.8% of the study participants had a cough in the two weeks before data collection.

184 **Table 2. Nutrition service and health-related factors of adolescent girls in Southern Ethiopia,**  
 185 **2019**

| Variable                                        | Level                    | Frequency(n) | Percent (%) |
|-------------------------------------------------|--------------------------|--------------|-------------|
| Decision maker for nutrition service            | Father                   | 542          | 66.1        |
|                                                 | Mother                   | 78           | 9.5         |
|                                                 | Jointly(Mother & Father) | 200          | 24.4        |
| Received nutrition education                    | Yes                      | 243          | 29.6        |
|                                                 | No                       | 577          | 70.4        |
| Received deworming tablets                      | Yes                      | 450          | 54.9        |
|                                                 | No                       | 370          | 45.1        |
| Number of deworming tablet received             | One                      | 155          | 34.4        |
|                                                 | Two                      | 295          | 65.6        |
| Received iron folic acid supplementation (IFAS) | Yes                      | 3            | 0.4         |
|                                                 | No                       | 817          | 99.6        |
| Friendly nutrition service given                | Yes                      | 495          | 60.4        |
|                                                 | No                       | 324          | 39.5        |
| Presence of cough                               | Yes                      | 228          | 27.8        |



187 Source: Field survey, 2019; IFAS, = Iron- folic acid supplementation

188 **Health and sanitation-related factors of adolescent girls in Southern Ethiopia**

189 Table 3 describes the health and sanitation related conditions of the study participants. Of the total 820  
 190 subjects, 47.0% of the adolescent girls are living on the floors of houses that are made from mud, and  
 191 58.5% of the study participants are living with domestic animals in the same house. Similarly, 48.7%  
 192 of the study participants are brushing their teeth once per day, 53.3% are washing their hands  
 193 sometimes before eating their food, 41.7% are usually washing their hands before eating, 3.4% are not  
 194 washing their hands at all, 90.1% are washing their hands after using the toilet, and 6.8% are not  
 195 washing their hands at all after using the toilet. When washing their hands, 90.1% of the study  
 196 participants are using soap and 9.9% are not using soap. Out of the total participants who are using  
 197 soap when washing their hands, only 42% are usually using soap and 58% are sometime using soap.

198 **Table 3. Health and sanitation-related factors of adolescent girls in Southern Ethiopia, 2019**

| Variable                                    | Level  | Frequency(n) | Percent (%) |
|---------------------------------------------|--------|--------------|-------------|
| Type of floor participants are living on    | Cement | 385          | 47.0        |
|                                             | Muddy  | 435          | 53.0        |
| Animals living in the same house?           | Yes    | 480          | 58.5        |
|                                             | No     | 340          | 41.5        |
| Number of windows                           | 0      | 4            | 0.5         |
|                                             | 1      | 41           | 5.0         |
|                                             | 2      | 231          | 28.2        |
|                                             | 3      | 297          | 36.2        |
|                                             | 5      | 11           | 1.3         |
| Frequency of teeth brushing (times per day) | 0      | 29           | 3.5         |
|                                             | 1      | 399          | 48.7        |

|                                                   |            |     |      |
|---------------------------------------------------|------------|-----|------|
|                                                   | 2          | 266 | 32.4 |
|                                                   | 3          | 123 | 15.0 |
| Do you wash your hands before eating?             | Not at all | 28  | 3.4  |
|                                                   | sometimes  | 437 | 53.3 |
|                                                   | Usually    | 342 | 41.7 |
| Do wash your hands after using the toilet         | Yes        | 764 | 93.2 |
|                                                   | No         | 56  | 6.8  |
| Are you using soap when washing your hands        | Yes        | 739 | 90.1 |
|                                                   | No         | 81  | 9.9  |
| How often do you use soap when washing your hands | Sometimes  | 429 | 58.0 |
|                                                   | Usually    | 310 | 42.0 |

199 Source: Field survey, 2019

#### 200 Meal patterns of adolescent girls in Southern Ethiopia

201 As indicated about 39.5% of the study participants are eating  $\geq$  four times per day. This indicates 60.5%  
 202 of the study participants are skipping regular meals. When considering the meals that participants are  
 203 skipping, 27.6%, 1.8%, and 42% are skipping breakfast, lunch, and snack, respectively. Similarly,  
 204 41.6% of the study participants are eating smaller meals that do not satisfy their needs. Maize is the  
 205 primary staple food for 40.6% of the study participants, and 38.8% consume both teff and maize as a  
 206 staple food. Participants purchase food from the market (40.4%) or grow their own food (50.6%) (Table  
 207 4).

208 **Table 4. Meal patterns of adolescent girls in Southern Ethiopia, 2019**

| Variables               | Level       | Frequency(n) | Percent (%) |
|-------------------------|-------------|--------------|-------------|
| Number of meals per day | Two times   | 6            | 0.7         |
|                         | Three times | 490          | 59.8        |

|                       |                                      |     |      |
|-----------------------|--------------------------------------|-----|------|
|                       | Four times and above                 | 324 | 39.5 |
| Skip regular meals    | Yes                                  | 496 | 60.5 |
|                       | No                                   | 324 | 39.5 |
| Meal skipped          | Breakfast                            | 137 | 27.6 |
|                       | Lunch                                | 15  | 1.8  |
|                       | Snack                                | 344 | 42.0 |
| Staple food           | Teff                                 | 169 | 20.6 |
|                       | Maize                                | 333 | 40.6 |
|                       | Teff & Maize                         | 318 | 38.8 |
| Where do you get food | Produce your own                     | 414 | 50.5 |
|                       | Market purchase                      | 331 | 40.4 |
|                       | Produce your own and market purchase | 69  | 8.4  |
| Eat small meals       | Yes                                  | 341 | 41.6 |
|                       | No                                   | 479 | 58.4 |

209 Source: Field survey, 2019

## 210 **Nutritional status of adolescent girls in Southern Ethiopia**

211 As shown in Table 5, 69.5% of the study participants have a normal body mass index i.e. body mass  
 212 index for age z-score is between -2 and -1. From the total study participants, 19.5% are moderately thin  
 213 as defined by a body mass index for age z-score between -2 and -3, 8% are severely thin as defined by a  
 214 body mass index for age z-score < -3. Only 3% of the study participants are overweight. When we  
 215 considered the stunting status of the study participants, 91.2% are normal as defined as a height for age  
 216 z-score > -2, 7.8% are moderately stunted, and 1% are severely stunted.

217 Fig 2 Comparison of BMI-for-age z-scores (BAZ) of the study population (N=820) with the 2007 WHO  
 218 growth reference populations

Fig 3. Comparison of height-for-age z-scores (HAZ) of the study population (N=820) with the 2007 WHO growth reference populations, 2019

219 Fig 4. BMI for age z-scores (BAZ) among adolescent girls in Southern Ethiopia, 2019.

220 Fig 5. Height for age z-scores (HAZ) among adolescent girls in Southern Ethiopia, 2019

221 **Table 5. Nutritional status of adolescent girls in Southern Ethiopia, 2019**

| Variables   | Level                 | Frequency(N) | Percent (%) |
|-------------|-----------------------|--------------|-------------|
| Grouped BAZ | BAZ between -2 and +1 | 570          | 69.5        |
|             | BAZ between -2 and -3 | 160          | 19.5        |
|             | BAZ < -3              | 65           | 8.0         |
|             | BAZ between +2 and +1 | 25           | 3.0         |
| Grouped HAZ | HAZ > -2              | 748          | 91.2        |
|             | HAZ between -2 and -3 | 64           | 7.8         |
|             | HAZ < -3              | 8            | 1.0         |

222 Source: field survey, 2019; BAZ, BMI for age z-score; HAZ, height for age z-score

223 **Association between variables and nutritional status of adolescent girls in Southern Ethiopia**

224 The present study shows an association between some variables with nutritional status, as defined by  
 225 BMI for age z-score (BAZ), of the study participants. BAZ was statistically associated with age,  
 226 family size, monthly household income, receiving deworming tablet(s), educational status of the  
 227 participant's fathers, decision making power for nutrition service, skipping regular meals, source of  
 228 food, and receiving home visits from health extension workers (Table 6).

229

230

231 **Table 6. Factors associated with nutritional status (BAZ) of adolescent girls in Southern Ethiopia,**

232 **2019**

| Variables               | Level     | BAZ<br>( $< -2$ ) | BAZ<br>( $> -2$ ) | Crude OR (CI)          | Adjusted OR (CI)       |
|-------------------------|-----------|-------------------|-------------------|------------------------|------------------------|
| Age (years)             | 10-14     | 144               | 243               | 2.397 (1.748-3.286)*** | 2.910 (2.030-4.173)*** |
|                         | > 15      | 83                | 344               | 1                      | 1                      |
| Family size             | $\leq 5$  | 57                | 195               | 1                      | 1                      |
|                         | > 5       | 170               | 398               | 1.46 (1.034-2.064)*    | 1.627 (1.105-2.396)*   |
| Monthly income (ETBirr) | < 1000    | 126               | 148               | 3.37 (2.28-4.98)***    | 2.54 (1.66-3.87)***    |
|                         | 1000-2000 | 49                | 249               | 0.779 (0.504-1.205)    | 0.74 (0.475-1.158)     |
|                         | > 2000    | 52                | 196               | 1                      | 1                      |

| Variables                   | Levels                 | Nutritional status |                   | Crude OR (CI)    | Adjusted OR (CI) |
|-----------------------------|------------------------|--------------------|-------------------|------------------|------------------|
|                             |                        | BAZ<br>( $< -2$ )  | BAZ<br>( $> -2$ ) |                  |                  |
| Receiving deworming tablets | Yes                    | 101                | 349               | 1                | 1                |
|                             | No                     | 126                | 244               | 1.8 (1.3-2.4)*** | 1.56 (1.1--21)*  |
| Father's educational status | No formal education    | 30                 | 51                | 1.94 (1.1-3.4)*  | 2.3 (1.1-4.8)*   |
|                             | 1-8 grade              | 73                 | 190               | 1.28 (0.82-1.96) | 1.7 (0.96-2.87)  |
|                             | 9-12 grade             | 81                 | 210               | 1.27 (0.83-1.95) | 1.78 (0.86-3.01) |
|                             | College and University | 43                 | 142               | 1                | 1                |

|                                      |         |     |     |                    |                      |
|--------------------------------------|---------|-----|-----|--------------------|----------------------|
| Decision-maker for nutrition service | Father  | 168 | 374 | 2.05 (1.37-3.07)** | 1.89 (1.214-2.94)**  |
|                                      | Mother  | 23  | 55  | 1.905 (1.37-3.07)* | 2.022 (1.016-4.024)* |
|                                      | Jointly | 36  | 164 | 1                  | 1                    |
| Skipping regular meals               | Yes     | 178 | 318 | 3.14 (2.2-4.48)*** | 2.83 (1.92-4.17)***  |
|                                      | No      | 49  | 275 | 1                  | 1                    |

233

| Variables                                    | Level                           | Nutritional status |            | Crude OR (CI)         | Adjusted OR (CI)    |
|----------------------------------------------|---------------------------------|--------------------|------------|-----------------------|---------------------|
|                                              |                                 | BAZ (< -2)         | BAZ (> -2) |                       |                     |
| Visited by health extension worker regularly | Yes                             | 83                 | 303        | 1                     | 1                   |
|                                              | No                              | 144                | 290        | 1.813 (1.32-2.483)*** | 1.72 (1.7--2.4)**   |
| Source of family food                        | Produce own                     | 109                | 306        | 3.74 (1.57-8.89)**    | 3.288 (1.3--8.1)*   |
|                                              | Market purchase                 | 112                | 224        | 5.25 (2.21-12.5)***   | 5.14 (2.1--12.8)*** |
|                                              | Produce own and market purchase | 6                  | 63         | 1                     | 1                   |

234 \**p-value* < 0.05, \*\**p-value* < 0.01, \*\*\**p-value* < 0.0001; BAZ, BMI for age z-score

235 There is also an association between some variables with nutritional status, as defined by height for  
 236 age z-scores (HAZ), of the study participants. HAZ of the study participants was statistically  
 237 associated with decision making power for nutrition service, hand washing practice before eating and  
 238 after using the toilet, and visiting a community health extension worker (Table 7).

239 **Table 7. Factors associated with nutritional status (HAZ) of adolescent girls in Southern Ethiopia,**  
 240 **2019**

| Variables                                    | Level   | Nutritional status |            | Crude OR (CI)         | Adjusted OR (CI)     |
|----------------------------------------------|---------|--------------------|------------|-----------------------|----------------------|
|                                              |         | HAZ (< -2)         | HAZ (> -2) |                       |                      |
| Decision-maker for nutrition service         | Father  | 54                 | 488        | 2.656 (1.241-5.685)** | 2.529 (1.106-6.087)* |
|                                              | Mother  | 10                 | 68         | 3.529 (1.4-9.310)**   | 2.58 (0.89-7.45)     |
|                                              | Jointly | 8                  | 192        | 1                     | 1                    |
| Hand washing before eating and after toilet  | Yes     | 61                 | 703        | 1                     | 1                    |
|                                              | No      | 11                 | 45         | 2.82 (1.39-5.73)**    | 2.25 (1.079-4.675)*  |
| Visited by community health extension worker | Yes     | 13                 | 237        | 1                     | 1                    |
|                                              | No      | 59                 | 509        | 2.13 (1.14- 3.93)*    | 2.036 (1.059-3.914)* |

241 \**p-value* < 0.05, \*\**p-value* < 0.001, \*\*\**p-value*<0.0001; HAZ, height for age z-score

## 242 Discussion

### 243 Health and nutritional status of adolescent girls in Southern Ethiopia

244 The BAZs revealed that 19.5% of the study participants were moderately thin and 8% were severely thin.

245 The prevalence of thinness is higher in our study than in a study conducted in the Amhara Region which

246 indicates that 13.6 % of adolescent girls are thin. Similarly, 7.8% and 1% of our study participants are

247 moderately stunted and severely stunted, respectively. This is lower than the study conducted in the

248 Amhara Region which indicated that 31.5 % of adolescent girls are stunted [18]. Our study is also

249 different from a study conducted in Adwa, Northern Ethiopia, which indicated that the prevalence of

250 thinness and stunting was 21.4% and 12.2%, respectively [19]. Another study conducted in Northern

251 Ethiopia indicated that 21.6% of adolescent girls are thin and 21.2% are stunted [9]. Our results are also

252 lower than a study conducted in Bangladesh which indicated that the prevalence of thinness and stunting

253 was 49.74% and 15.1%, respectively [20]. The reasons for the observed undernutrition of the current

254 study participants might be due to their low monthly household income because 33.7% of the study

255 participants were from the families whose monthly incomes were below 1000 ETBirr. Similarly, 69.3%

256 of the study participants are from families with  $\geq 5$  people. In our study, 14.3% of the study participants'

257 fathers have no formal education and 9.9% of the study participants have only completed grades 1-4.

258 Only 41.7% of our study participants usually wash their hands before eating food. Also, 42.0% of our

259 study participants usually use soap when washing their hands. A similar study, conducted in the Somali

260 Region of Ethiopia, indicated that hand washing with soap after using the toilet and before eating affected

261 the nutritional status of adolescent girls [21]. This might lead to the low nutritional status of adolescent

262 girls. Moreover, 60.5% of the study participants are skipping regular meals. This finding is greater than

263 the study conducted among adolescent girls in Agarfa High School, Oromia Region which indicated the

264 prevalence of skipping meals was 49.53% [22]. In addition to skipping their regular meals, 40.4% of the

265 study participants are purchasing their food from the market. In order to buy food from the market, cash



266 income is needed. This might be affected by market fluctuation, household income, and takes more time  
267 which can lead to undernutrition [23].

268 The decision-making power of the family also might affect the nutritional status of adolescent girls  
269 Decision-making for receiving nutrition services is under the control of 66.1% of the study participants'  
270 father. Similarly, 45.1% of the study participants did not receive a deworming tablet. Therefore, this  
271 might further aggravate the low nutritional status of the study subjects [24].

### 272 **Factors associated with the nutritional status (BAZ) of adolescent girls in Southern Ethiopia**

273 In this study, the BAZs of the study participants was statistically associated with the age of the  
274 adolescent girls ( $p < 0.001$ ). Adolescent girls between the ages of 10-14 years were 2.9 times more likely  
275 to be malnourished (thin) than adolescent girls  $\geq 15$  years. This finding is in line with the study  
276 conducted in the Amhara Region [18].

277 Family size was statistically associated with the nutritional status of adolescent girls ( $p < 0.05$ ).  
278 Adolescent girls with a family size  $> 5$  were 1.6 times more likely to be malnourished (thin) than those  
279 who came from a family with  $\leq 5$  people. This finding is supported by studies conducted in the city of  
280 Arar [25], Nigeria [26], and the Amhara Region [18]. Large families may share food among the family  
281 members [19].

282 Monthly household income is statistically associated with the nutritional status of adolescent girls  
283 ( $p < 0.001$ ). Adolescent girls from families whose monthly income was  $< 1000$  ETBirr were 2.5 times  
284 more likely to be malnourished (thin) than those from families who have monthly incomes  $> 2000$   
285 ETBirr. This finding is in line with studies conducted in Bangladesh [27, 28] and Nigeria [29]. This  
286 might be because the household income affects the purchasing power of the household and families  
287 with lower incomes are more likely to be malnourished [30].

288 Taking deworming tablets was significantly associated with the nutritional status of the study participants  
289 ( $p < 0.05$ ). Study participants who did not take deworming table every six months were 1.56 times more  
290 likely to be malnourished (thin) than those who took a deworming tablet every six months. According to  
291 WHO preventive deworming recommendations, a biannual single-dose of albendazole (400 mg) or  
292 mebendazole (500 mg) is recommended  a public health intervention for all non-pregnant adolescent  
293 girls and women of reproductive age in order to reduce the worm burden of soil-transmitted helminthes  
294 which can affect nutritional status of adolescent girls  [1]. In addition to this, a systematic review and  
295 meta-analysis indicated that taking deworming tablets improves the nutritional status of adolescent girls  
296 [32].

297 The educational status of the participant's fathers was significantly associated with the nutritional status  
298 of the study participants ( $p < 0.05$ ). Study participants whose fathers who had no formal education were  
299 2.3 times more likely to be malnourished (thin) than those whose fathers completed college and  
300 university. This finding is in line with a study conducted in the cities of Tehran [33] and in Adama in  
301 Central Ethiopia [34].

302 Decision-making power for nutrition services was statistically associated with the nutritional status of  
303 the study participants ( $p < 0.001$ ). Adolescent girls from families whose decision-maker was the father  
304 or the mother were 1.9 and 2.02 times, respectively, more likely to be malnourished (thin) than  
305 adolescent girls who were from families in which both parents jointly make decisions for nutrition  
306 service. 

307 Regularly skipping meals was significantly associated with the nutritional status of adolescent girls  
308 ( $p < 0.0001$ ). Adolescent girls who skip their regular meals were 2.8 times more likely to be  
309 malnourished ed than those who did not skipping their regular meals. This finding is supported by a study

310 conducted in Nigeria [35, 36] and in the Bale Zone [22]. This might be because skipping regular meals  
311 is an unhealthy eating behavior which can affect the nutritional status of adolescent girls [37].

312 The source of food was statistically associated with the nutritional status of adolescent girls ( $p < 0.0001$ ).  
313 Adolescent girls who were getting their food only from what their families produce or only purchasing  
314 it from the market were 3.28 and 5.14 times, respectively, more likely to be malnourished (thin) than  
315 those who were getting their food from both what their families produce and purchase from the market.

316 In addition to this, participants who were visited by a health extension worker at their home are more  
317 likely to be nutritionally normal. Visits by health extension workers were statistically associated with  
318 the nutritional status of adolescent girls ( $p < 0.001$ ). Adolescent girls who were not visited by health  
319 extension workers in their homes were 1.72 times more likely to be malnourished (thin) than those who  
320 were visited by health extension workers at their homes within the past three months. This might be  
321 due to nutritional counseling that can result in the improvement of nutritional knowledge and  
322 behavioral change for improved nutrition [38].

### 323 **Factors associated with the nutritional status (HAZ) of adolescent girls in Southern Ethiopia**

324 Decision-making power for nutrition services was statistically associated with HAZs of the study  
325 participants ( $p < 0.05$ ). Adolescent girls from families whose decision-maker father or mother were  
326 2.53 or 2.6 times, respectively, more likely to be malnourished (stunted) than adolescent girls from  
327 families which both parents jointly make decisions for nutrition services. Similarly, hand washing  
328 practices before eating and after using the toilet were statistically associated with the stunting of  
329 adolescent girls ( $p < 0.05$ ). Adolescent girls who did not wash their hands before eating and after using the  
330 toilet were 2.3 times more likely to be stunted than adolescent girls who were washing their hands before  
331 eating and after using the toilet. This is supported by a study conducted in Nepal [39]. Visits by health

332 extension workers in the community were statistically associated with the stunting status of adolescent  
333 girls ( $p < 0.05$ ). Adolescent girls who were not visited frequently by health extension workers at the  
334 community level were 2.04 times more likely to be stunted than those who were frequently visited by  
335 health extension workers at the community level.

## 336 **Conclusions**

337 Thinness and stunting are found to be high in the study area. Age, family size, monthly household income,  
338 regularly skipping meals, fathers' educational status, visits by health extension workers, and nutrition  
339 services decision-making power are the main predictors of thinness. Hand washing practice, visits by  
340 health extension workers, and nutrition services decision-making power are the main predictors of  
341 stunting among adolescent girls in Southern Ethiopia.

## 342 **Recommendation**

- 343 • At all levels, the girls' nutrition education/counseling should be given due emphasis as they are  
344 tomorrow's mothers which is very important to break the intergenerational cycle of malnutrition.
- 345 • Income-generating activities should be implemented to improve the monthly income status of the  
346 family as it affects the nutritional status of adolescent girls.
- 347 • Health extension workers should visit and give nutrition education regularly for adolescent girls at  
348 their homes and at community meetings.
- 349 • Hand washing practice should be improved before eating food and after using the toilet.
- 350 • Everything in the household should be decided jointly (both mother and father) to improve the ability  
351 to utilize resources among the household member.
- 352 • Health extension workers should give counseling for adolescent girls not to skip their regular meals.

## 353 **Acknowledgments**

354 Above all, I want to express my heartfelt thanks to the Almighty God, who helped me to accomplish  
355 this work and provides His blessing for me throughout my life. I acknowledge the Wolaita and Hadiya  
356 zones health office leaders and experts for their valuable cooperation during data collection and I  
357 would like to extend my gratitude to all the data collectors who participated in this research and  
358 adolescent girls who were willing to participate in this study. I am also grateful to the center of Food  
359 Science and Nutrition, Addis Ababa and Tufts University for facilitation and support.

## 360 **Author Contributions**

- 361 • Conceptualization: Yoseph Halala, Tefera Belachew, Cherinet Abuye, Abdulhalik Workicho,  
362 Kaleab Baye
- 363 • Data curation: Yoseph Halala, Tefera Belachew, Cherinet Abuye, Abdulhalik Workicho, Kaleab  
364 Baye
- 365 • Formal analysis: Yoseph Halala, Tefera Belachew, Cherinet Abuye, Abdulhalik Workicho, Kaleab  
366 Baye
- 367 • Funding acquisition: Yoseph Halala, Tefera Belachew, Cherinet Abuye, Abdulhalik Workicho,  
368 Kaleab Baye
- 369 • Investigation: Yoseph Halala, Tefera Belachew, Cherinet Abuye, Abdulhalik Workicho, Kaleab  
370 Baye
- 371 • Methodology: Yoseph Halala, Tefera Belachew, Cherinet Abuye, Abdulhalik Workicho, Kaleab  
372 Baye
- 373 • Project administration: Yoseph Halala, Tefera Belachew, Cherinet Abuye, Abdulhalik Workicho,  
374 Kaleab Baye
- 375 • Resources: Yoseph Halala, Tefera Belachew, Cherinet Abuye, Abdulhalik Workicho, Kaleab Baye
- 376 • Software: Yoseph Halala, Tefera Belachew, Cherinet Abuye, Abdulhalik Workicho, Kaleab Baye
- 377 • Supervision: Yoseph Halala, Tefera Belachew, Cherinet Abuye, Abdulhalik Workicho, Kaleab Baye

- 378 • Validation: Yoseph Halala, Tefera Belachew, Cherinet Abuye, Abdulhalik Workicho, Kaleab Baye  
 379 • Writing ± original draft: Yoseph Halala, Tefera Belachew, Cherinet Abuye, Abdulhalik Workicho,  
 380 Kaleab Baye  
 381 • Writing ± review & editing: Yoseph Halala, Tefera Belachew, Cherinet Abuye, Abdulhalik  
 382 Workicho, Kaleab Baye  
 383 • **Data Availability Statement:** All relevant data are within the paper and its Supporting information  
 384 file. [English Version Questionnaire and information sheet.docx](#).  
 385 • **Funding:** Addis Ababa University center for food science and nutrition and Wolaita Sodo  
 386 University  
 387 • **Competing interests:** The authors have declared that no competing interests exist.

## 388 **References**

- 389 1. WHO, *Nutrition in adolescence: issues and challenges for the health sector: issues in adolescent health*  
 390 *and development*. 2005: Geneva: World Health Organization.  
 391 2. CSA, *Ethiopia Demographic and Health Survey 2016*. Ababa, Ethiopia, and Rockville, Maryland, USA: CSA  
 392 and ICF, 2016.  
 393 3. Ng, M., et al., *Global, regional, and national prevalence of overweight and obesity in children and adults*  
 394 *during 1980–2013: a systematic analysis for the Global Burden of Disease Study 2013*. The lancet, 2014.  
 395 **384**(9945): p. 766-781.  
 396 4. Mulugeta, A., et al., *Nutritional status of adolescent girls from rural communities of Tigray, Northern*  
 397 *Ethiopia*. Ethiopian Journal of Health Development, 2009. **23**(1).  
 398 5. Demilew, Y.M. and A.A. Emiru, *Under nutrition and associated factors among school adolescents in*  
 399 *Dangila Town, Northwest Ethiopia: a cross sectional study*. African health sciences, 2018. **18**(3): p. 756-  
 400 766.  
 401 6. Martins, V.J., et al., *Long-lasting effects of undernutrition*. International journal of environmental  
 402 research and public health, 2011. **8**(6): p. 1817-1846.  
 403 7. Black, R.E., S.S. Morris, and J. Bryce, *Where and why are 10 million children dying every year?* The lancet,  
 404 2003. **361**(9376): p. 2226-2234.  
 405 8. Guilloateau, P., et al., *Adverse effects of nutritional programming during prenatal and early postnatal life,*  
 406 *some aspects of regulation and potential prevention and treatments*. J Physiol Pharmacol, 2009.  
 407 **60**(Suppl 3): p. 17-35.  
 408 9. Melaku, Y.A., et al., *Prevalence and factors associated with stunting and thinness among adolescent*  
 409 *students in Northern Ethiopia: a comparison to World Health Organization standards*. Archives of Public  
 410 Health, 2015. **73**(1): p. 44.  
 411 10. Cnattingius, S. and E. Villamor, *Weight change between successive pregnancies and risks of stillbirth and*  
 412 *infant mortality: a nationwide cohort study*. The Lancet, 2016. **387**(10018): p. 558-565.  
 413 11. Bay, J.L., S.M. Morton, and M.H. Vickers. *Realizing the potential of adolescence to prevent*  
 414 *transgenerational conditioning of noncommunicable disease risk: multi-sectoral design frameworks*. in  
 415 *Healthcare*. 2016. Multidisciplinary Digital Publishing Institute.  
 416 12. MoH, E.F., *Program Implementation Manual of National Nutrition Program (NNP)–I July 2008–June*  
 417 *2010*. Addis Ababa, Ethiopia: Federal Ministry of Health (MoH), 2008.

- 418 13. Nutrition, U.N.A.C.o.C.-o.S.-c.o. and I.F.P.R. Institute, *4th report on the world nutrition situation: nutrition throughout the life cycle*. 2000: United Nations, Administrative Committee on Coordination, Subcommittee on ....
- 419
- 420
- 421 14. Organization, W.H., *Adolescent nutrition: a review of the situation in selected South-East Asian countries*. 2006, WHO Regional Office for South-East Asia.
- 422
- 423 15. Bundy, D.A., et al., *Child and Adolescent Health and Development: Realizing Neglected Potential*, in *Child and Adolescent Health and Development. 3rd edition*. 2017, The International Bank for Reconstruction and Development/The World Bank.
- 424
- 425
- 426 16. Bekele, A., M. Kefale, and M. Tadesse, *Preliminary assessment of the implementation of the health services extension program: the case of southern Ethiopia*. *Ethiop J Health Dev*, 2008. **22**(3): p. 302-305.
- 427
- 428 17. Abrha, S., S. Shiferaw, and K.Y. Ahmed, *Overweight and obesity and its socio-demographic correlates among urban Ethiopian women: evidence from the 2011 EDHS*. *BMC Public Health*, 2016. **16**(1): p. 636.
- 429
- 430 18. Wassie, M.M., et al., *Predictors of nutritional status of Ethiopian adolescent girls: a community based cross sectional study*. *BMC Nutrition*, 2015. **1**(1): p. 20.
- 431
- 432 19. Gebregyorgis, T., T. Tadesse, and A. Atenafu, *Prevalence of thinness and stunting and associated factors among adolescent school girls in Adwa Town, North Ethiopia*. *International journal of food science*, 2016. **2016**.
- 433
- 434
- 435 20. Tamanna, S., et al., *Assessment of Nutritional Status among Adolescent Garo in Sherpur District, Bangladesh*. *Bangladesh Journal of Medical Science*, 2013. **12**(3): p. 269-275.
- 436
- 437 21. Awel, A.A., T.B. Lema, and H.J. Hebo, *Nutritional status and associated factors among primary school adolescents of pastoral and agro-pastoral communities, Mieso Woreda, Somali Region, Ethiopia: A comparative cross-sectional study*. *Journal of Public Health and Epidemiology*, 2016. **8**(11): p. 297-310.
- 438
- 439
- 440 22. Mohammed, A.Y. and T.B. Tefera, *Nutritional status and associated risk factors among adolescent girls in Agarfa high school, Bale Zone, Oromia Region, South East Ethiopia*. *Int J Nutr Food Sci*, 2015. **4**(4): p. 445-452.
- 441
- 442
- 443 23. Sibhatu, K.T. and M. Qaim, *Rural food security, subsistence agriculture, and seasonality*. *PloS one*, 2017. **12**(10): p. e0186406.
- 444
- 445 24. Amugsi, D.A., et al., *Women's participation in household decision-making and higher dietary diversity: findings from nationally representative data from Ghana*. *Journal of Health, Population and Nutrition*, 2016. **35**(1): p. 16.
- 446
- 447
- 448 25. Alenazi, S.A., et al., *Prevalence of obesity among male adolescents in Arar Saudi Arabia: future risk of cardiovascular disease*. *Indian journal of community medicine: official publication of Indian Association of Preventive & Social Medicine*, 2015. **40**(3): p. 182.
- 449
- 450
- 451 26. Adesina, A.F., et al., *Weight status of adolescents in secondary schools in port Harcourt using Body Mass Index (BMI)*. *Italian journal of pediatrics*, 2012. **38**(1): p. 31.
- 452
- 453 27. Nurul, A., et al., *Nutritional status, dietary intake, and relevant knowledge of adolescent girls in rural Bangladesh*. *Journal of Health, Population and Nutrition*, 2010. **28**(1): p. 86-94.
- 454
- 455 28. Hossain, G.M., et al., *A study on nutritional status of the adolescent girls at Khagrachhari district in Chittagong hill tracts, Bangladesh*. *American Journal of Life Sciences*, 2013. **1**(6): p. 278-282.
- 456
- 457 29. Iyalomhe, S.I., et al., *Assessment of Dietary Habits and Nutritional Status of Adolescents in a Resource-Poor Environment in Nigeria*. *International Journal of Nutrition and Food Sciences*, 2018. **7**(4): p. 121.
- 458
- 459 30. Schuftan, C., *"Household purchasing-power deficit" A more operational indicator to express malnutrition*. *Ecology of Food and Nutrition*, 1979. **8**(1): p. 29-35.
- 460
- 461 31. Organization, W.H., *Guideline: preventive chemotherapy to control soil-transmitted helminth infections in at-risk population groups*. 2017: World Health Organization.
- 462
- 463 32. Ghogomu, E.T., et al., *Deworming in non-pregnant adolescent girls and adult women: a systematic review and meta-analysis*. *Systematic reviews*, 2018. **7**(1): p. 239.
- 464

- 465 33. Alavi, M., et al., *Dietary habits among adolescent girls and their association with parental educational*  
466 *levels*. Global journal of health science, 2013. **5**(5): p. 202.
- 467 34. Roba, K., M. Abdo, and T. Wakayo, *Nutritional status and its associated factors among school adolescent*  
468 *girls in Adama City, Central Ethiopia*. J Nutr Food Sci, 2016. **6**(493): p. 2.
- 469 35. Olumakaiye, M., T. Atinmo, and M. Olubayo-Fatiregun, *Food consumption patterns of Nigerian*  
470 *adolescents and effect on body weight*. Journal of nutrition education and behavior, 2010. **42**(3): p. 144-  
471 151.
- 472 36. Adesola, O.A., et al., *Breakfast habit and nutritional status of undergraduates in Ekiti State, Nigeria*. Sci J  
473 Public Health, 2014. **2**(4): p. 252-256.
- 474 37. Chin, Y. and M. Mohd Nasir, *Eating behaviors among female adolescents in Kuantan district, Pahang,*  
475 *Malaysia*. Pak J Nutr, 2009. **8**(4): p. 425-432.
- 476 38. Saibaba, A., et al., *Nutritional status of adolescent girls of urban slums and the impact of IEC on their*  
477 *nutritional knowledge and practices*. Indian J Community Med, 2002. **27**(4): p. 151-6.
- 478 39. Hamal, S., et al., *Prevalence of anaemia and its associated factors among school adolescent girls in*  
479 *Baglung municipality, Nepal*. Global journal of medicine and public health 2018. **7**(5).

480



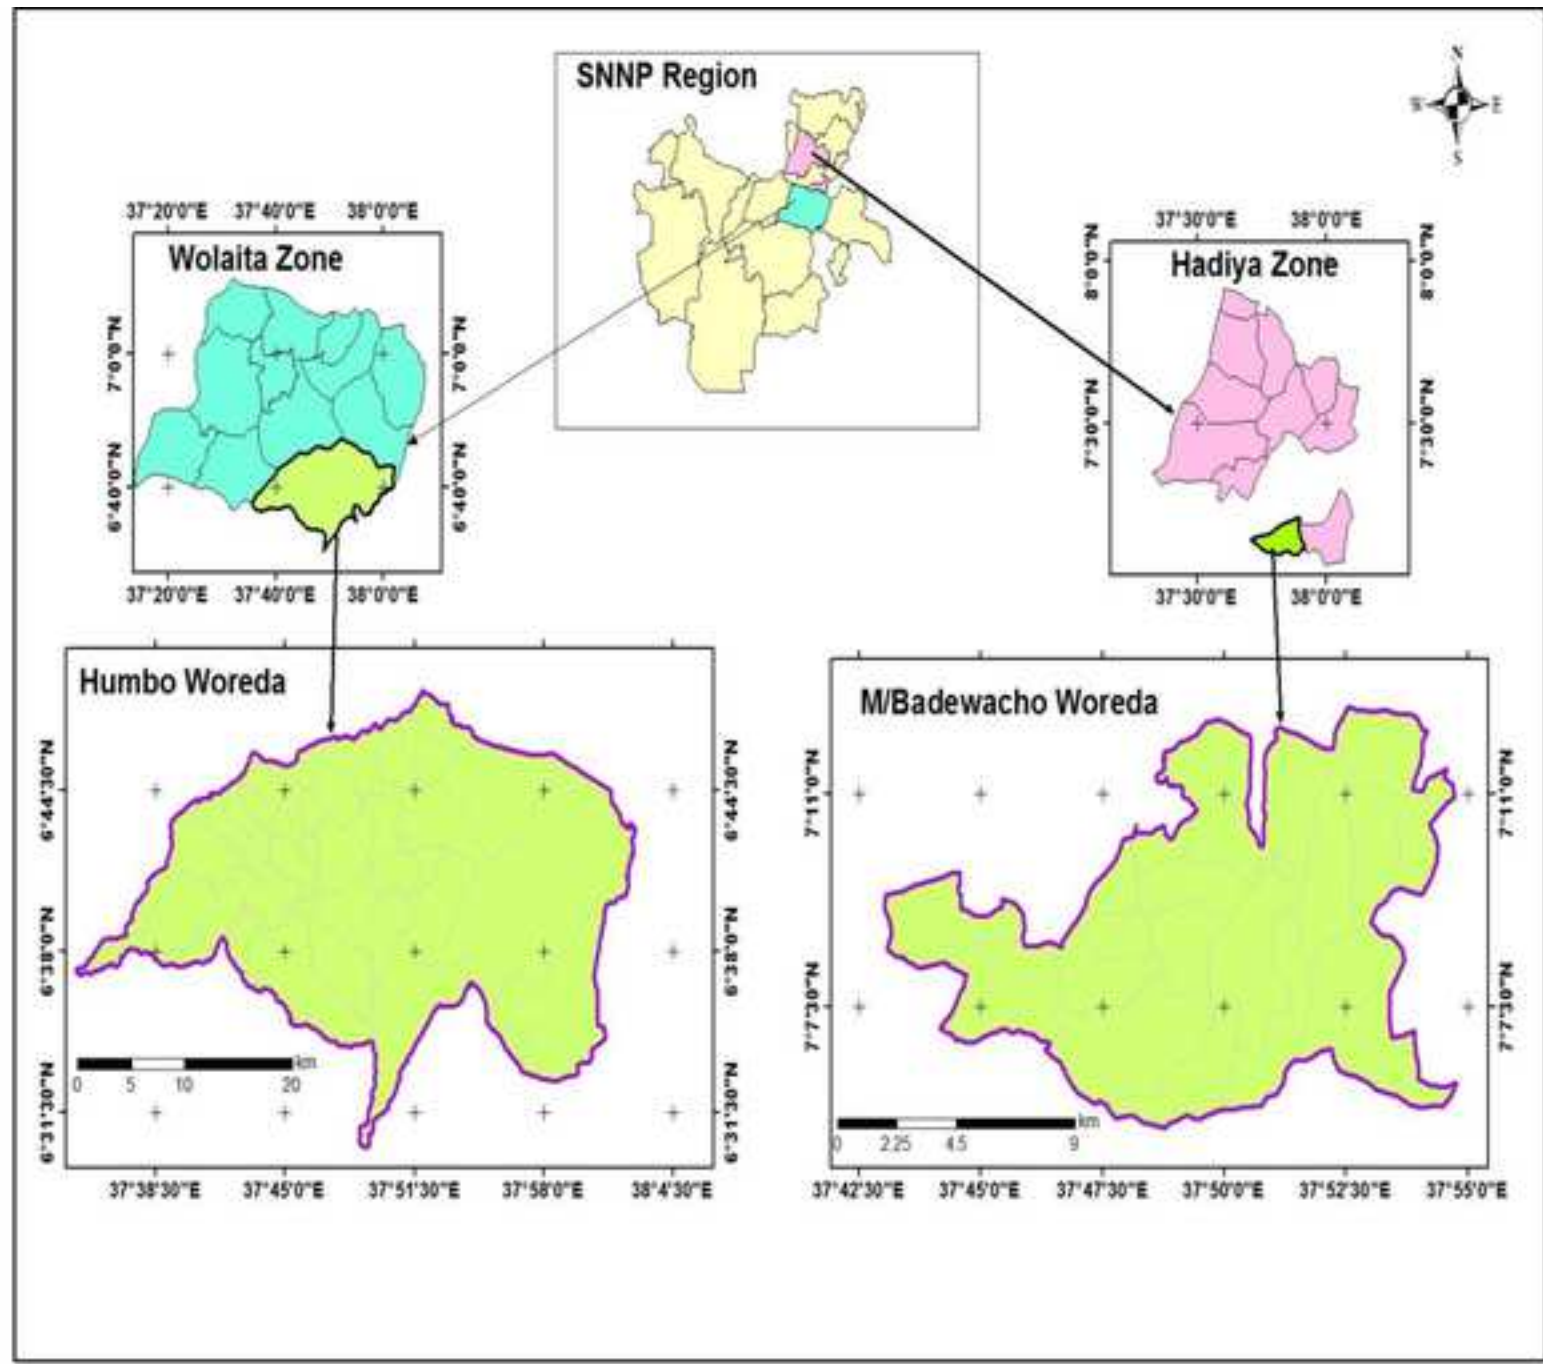

Figure 1: Map of the study sites (Wolaita and Hadiya zones) in SNNPR, 2019

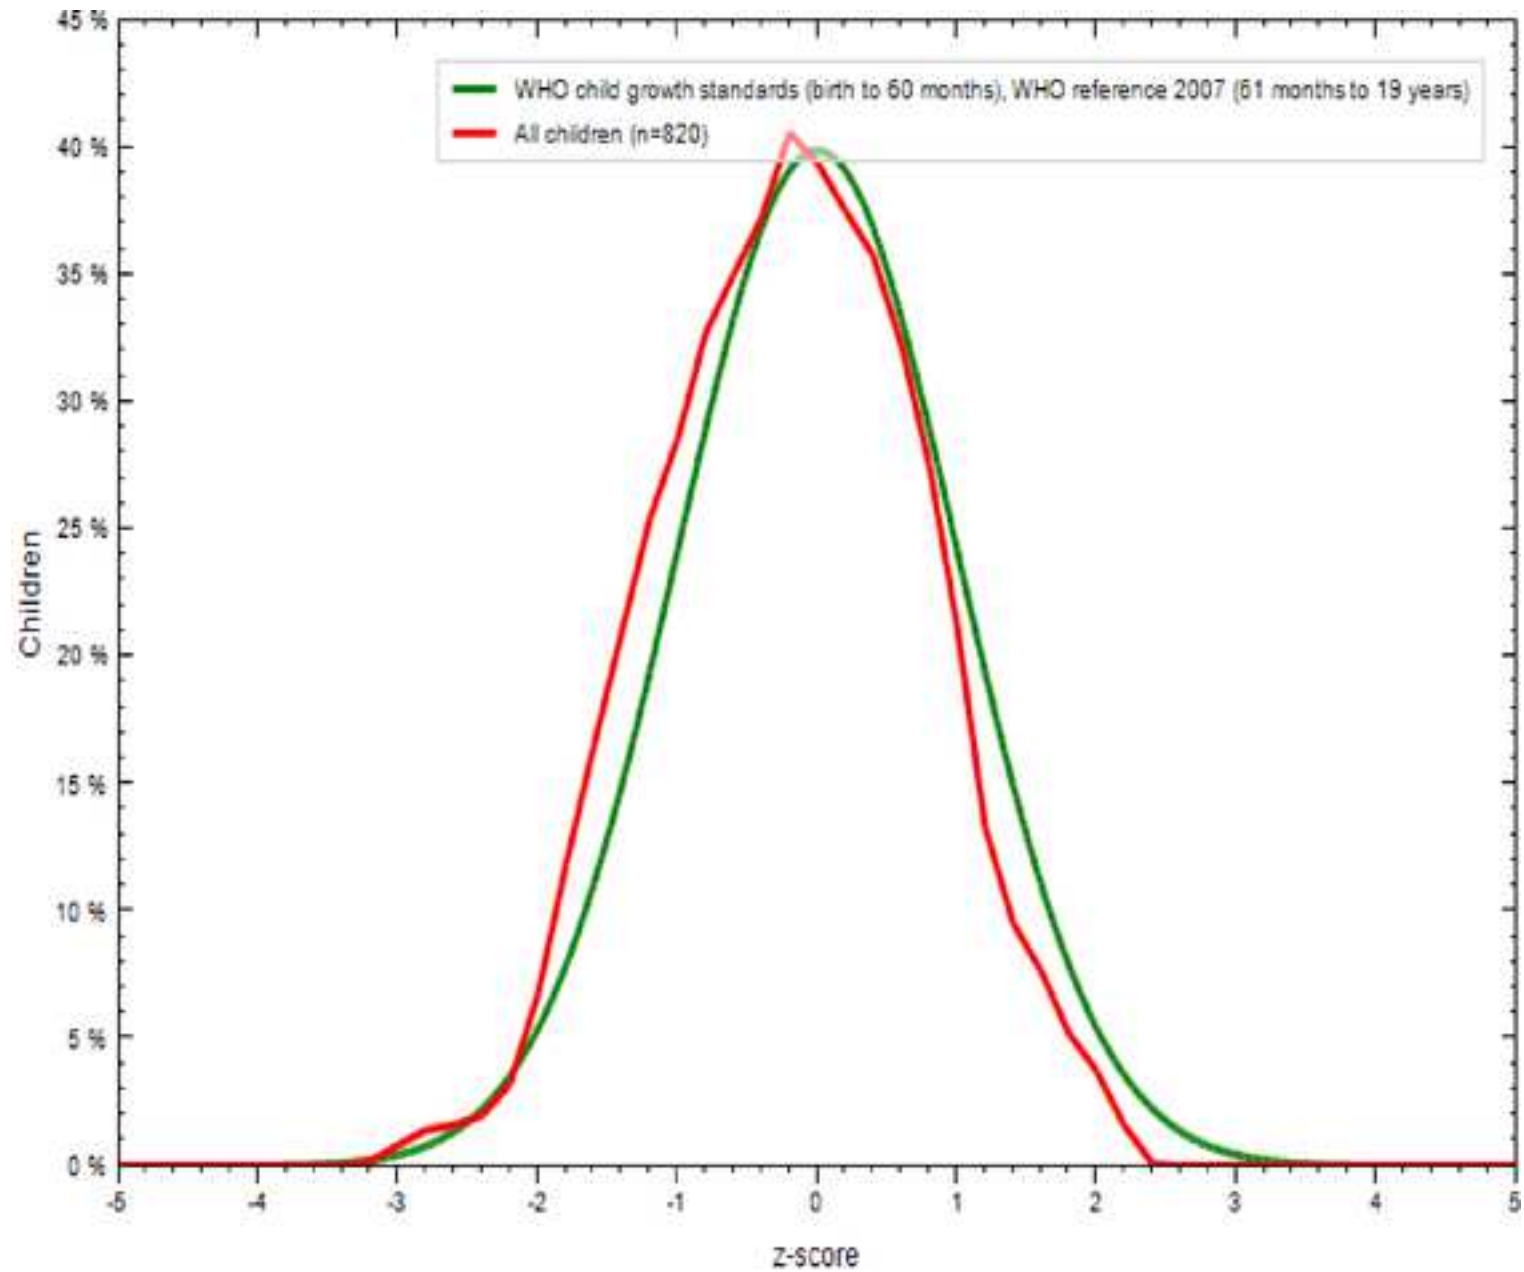

Figure2: Comparison of BMI-for-age (BAZ) of study population (N=820) with the 2007 WHO growth reference populations, 2019

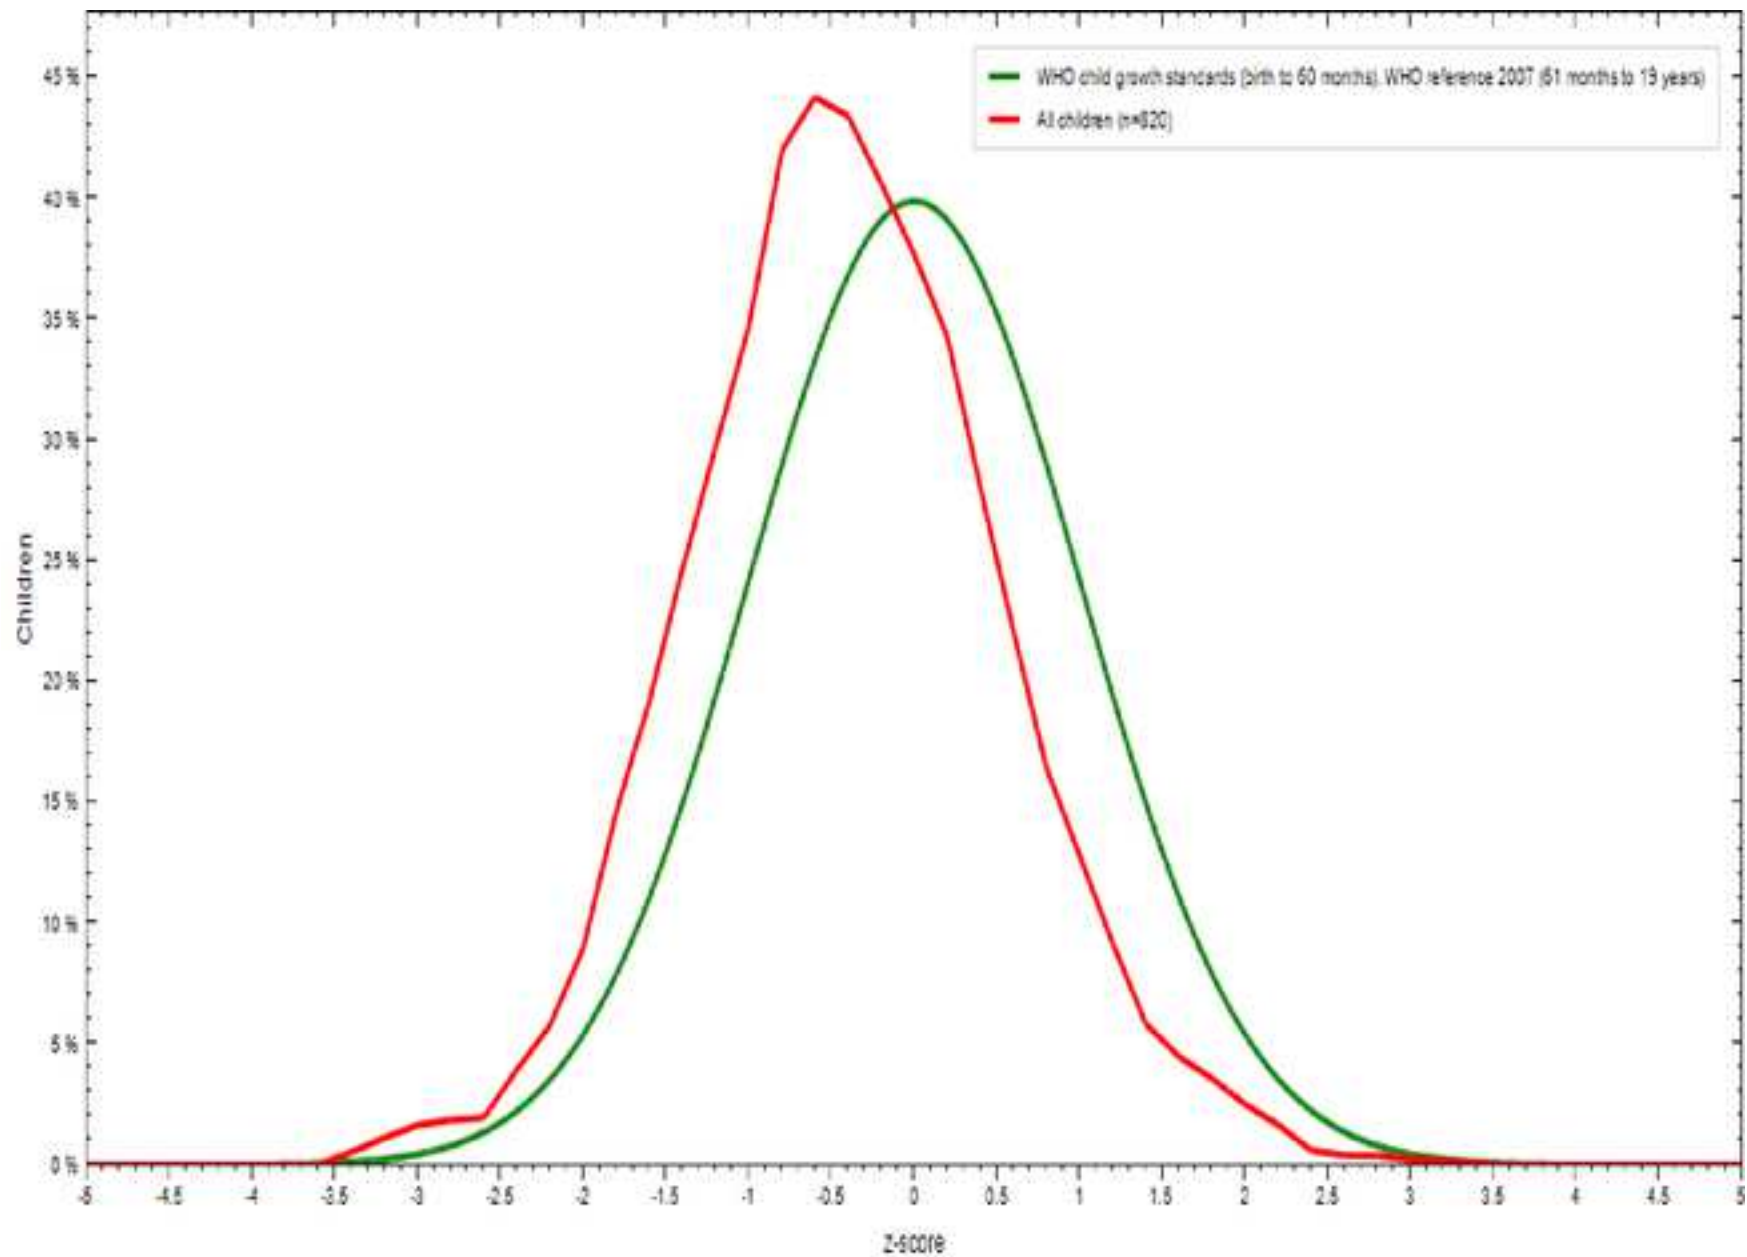

Figure3: Comparison of height-for-age (HAZ) of study population (N=820) with the 2007 WHO growth reference populations, 2019

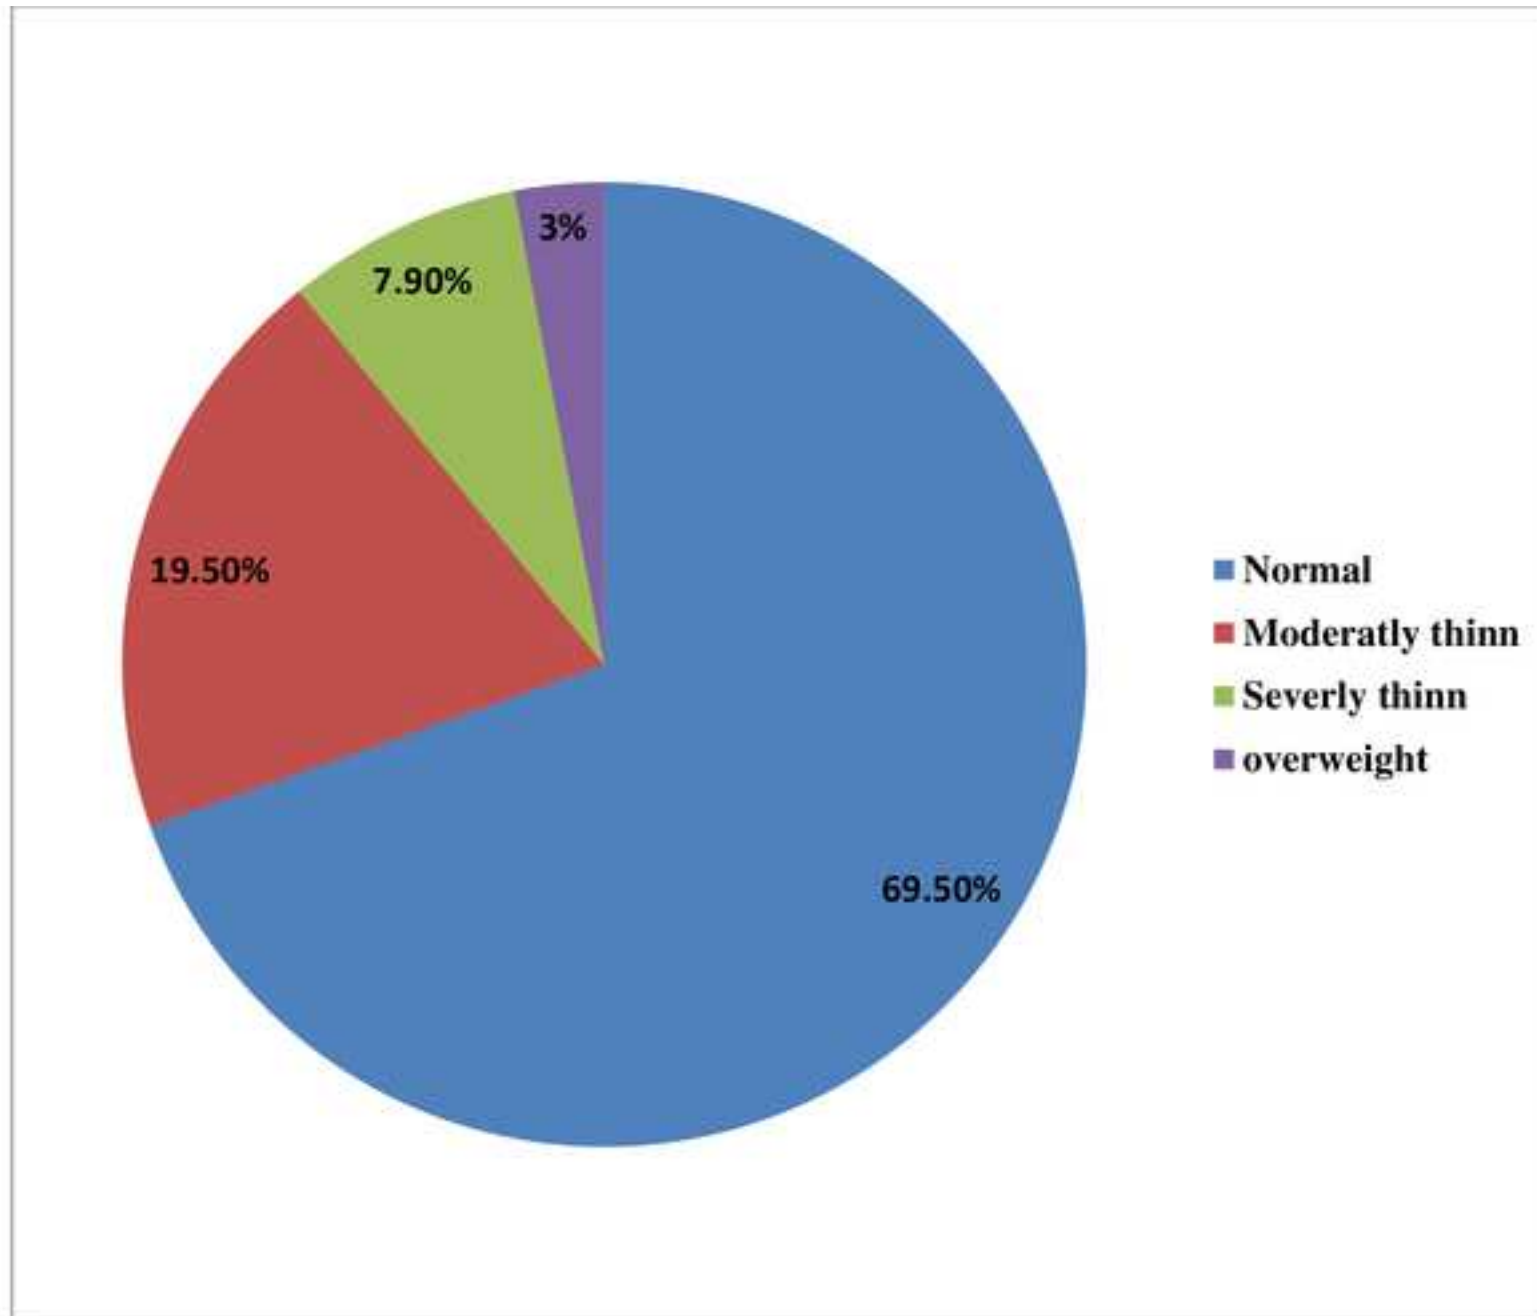

Figure4: Pi-chart representation of BMI for age Z-score (BAZ) among adolescent girls in southern Ethiopia, 2019.

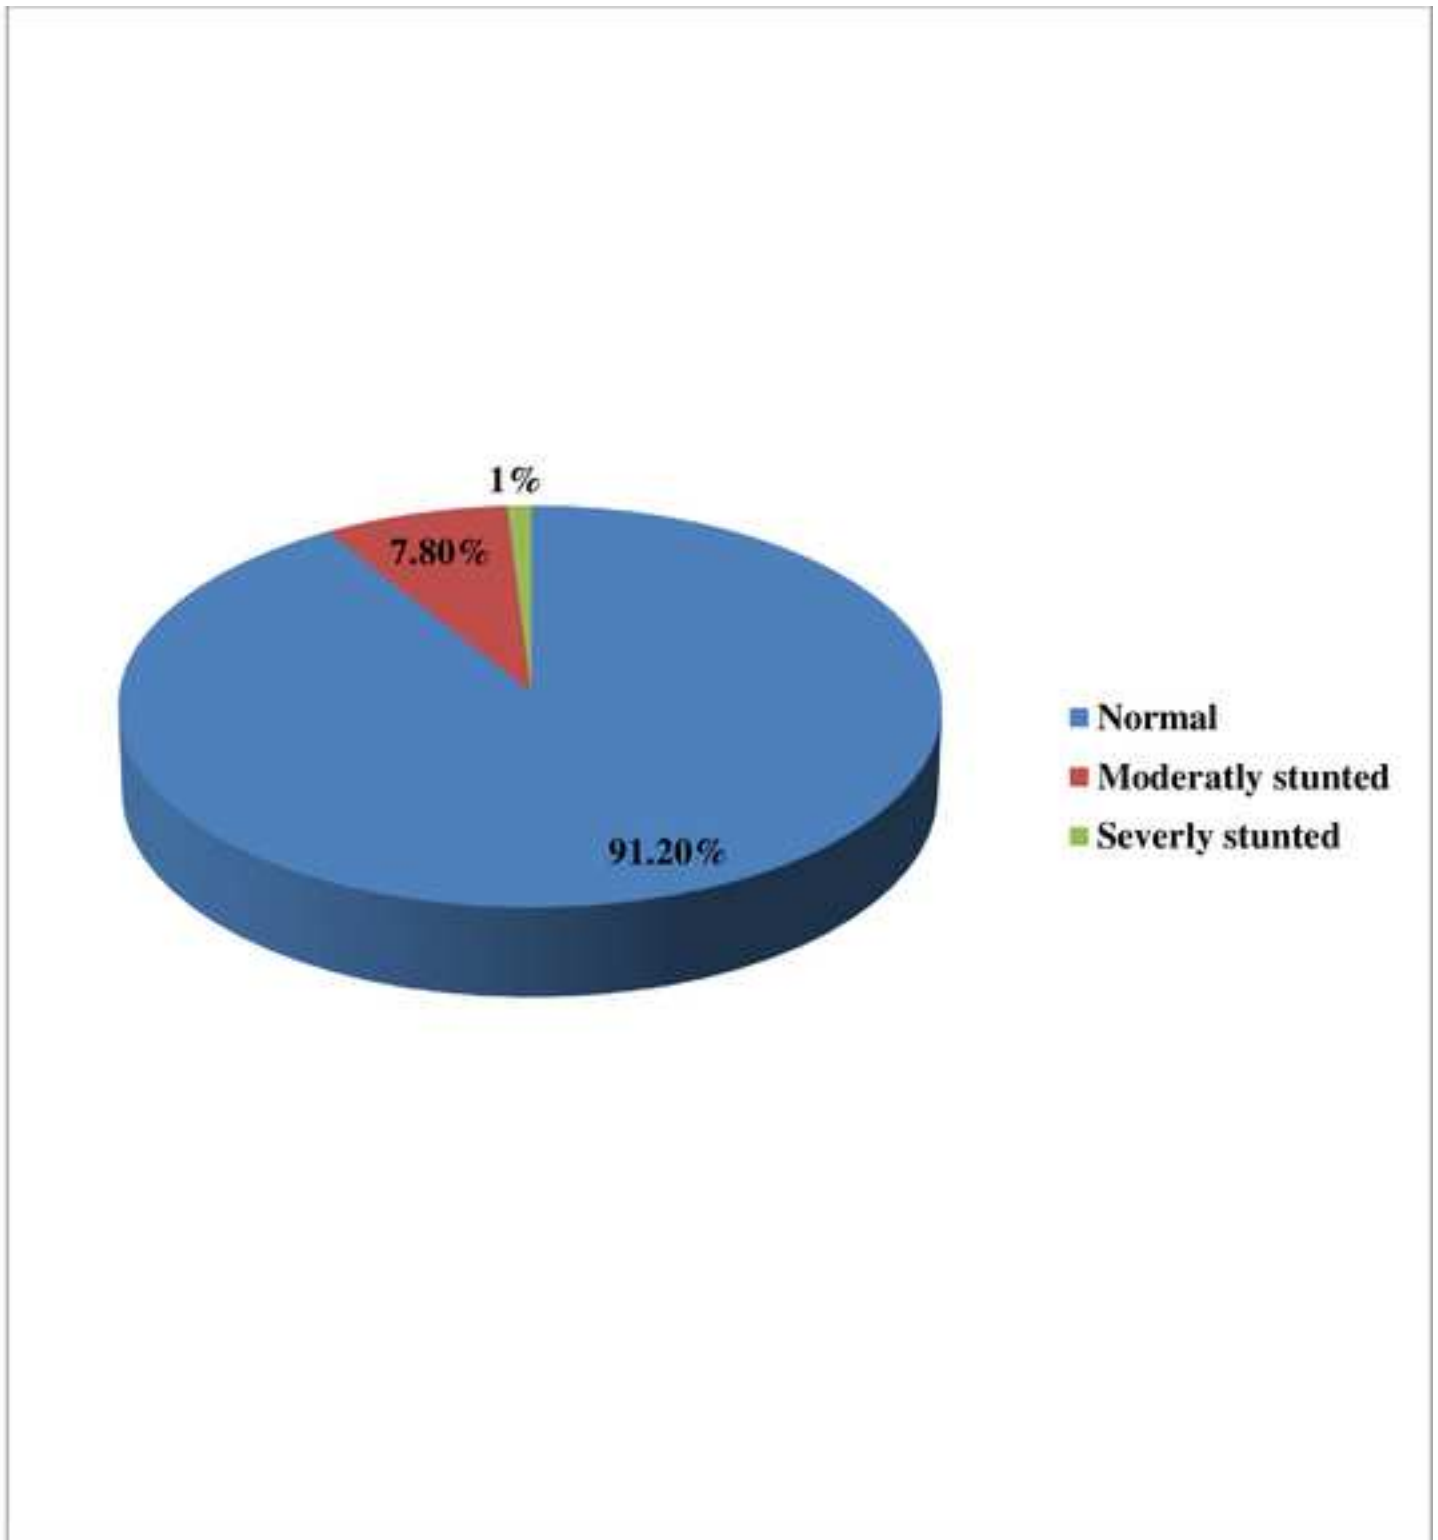

**Figure5: Pi-chart representation of height for age Z-score (HAZ) among adolescent girls in southern Ethiopia, 2019**

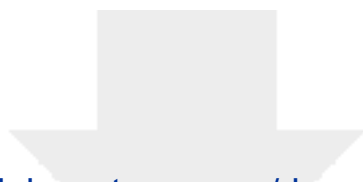

Click here to access/download  
**Supporting Information**  
Manuscript2--Track changed.docx

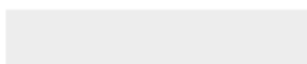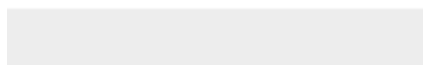

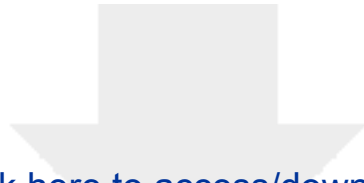

Click here to access/download

**Supporting Information**

Certificate\_of\_editing-ABPHH\_2.pdf

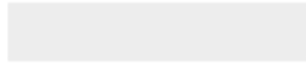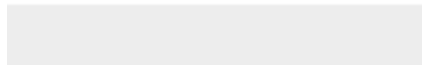

Supplement: pone.0240677.s004.pdf [file pone.0240677.s004.pdf]
